# Supplementary material for: A tetranuclear-cluster-based MOF with a low-polarity pore environment for efficient C 2 H 6 /C 2 H 4 separation
Source: Royal Society of Chemistry journal article supplement (doi:10.1039/d4qi01685h), 2024-01-01
Supplement: d4qi01685h1.pdf [file d4qi01685h1.pdf]

## Supplementary Information

### Tetranuclear-cluster-based MOF with low-polar pore environment for efficient C<sub>2</sub>H<sub>6</sub>/C<sub>2</sub>H<sub>4</sub> separation

Meng Feng<sup>a</sup>, Jiantang Li<sup>a</sup>, Xirong Wang<sup>a</sup>, Jingyu Wang<sup>a</sup>, Dongmei Wang<sup>\*a</sup> and  
Banglin Chen<sup>\*ab</sup>

<sup>a</sup> Key Laboratory of the Ministry of Education for Advanced Catalysis Materials, College of Chemistry and Materials Sciences, Zhejiang Normal University, Jinhua 321004 (P. R. China). E-mail: dmwang@zjnu.edu.cn

<sup>b</sup> Fujian Key Laboratory of Polymer Materials, College of Chemistry and Materials Sciences, Fujian Normal University, Fujian, 350007, P. R. China. E-mail: banglin.chen@fjnu.edu.cn

|                                                                                                                                                                                                                         |           |
|-------------------------------------------------------------------------------------------------------------------------------------------------------------------------------------------------------------------------|-----------|
| <b>Calculation procedures of selectivity from IAST</b> .....                                                                                                                                                            | <b>2</b>  |
| <b>S1. Supporting Figures</b> .....                                                                                                                                                                                     | <b>3</b>  |
| Fig S1. Coordinated environment of tetranuclear manganese cluster.....                                                                                                                                                  | 3         |
| Fig S2. PXRD patterns of ZJNU-400 for simulated, as-synthesized and PXRD of in water and some organic solvent for three days.....                                                                                       | 3         |
| Fig S3. Thermogravimetric analysis curve of ZJNU-400 for the as-synthesized sample.....                                                                                                                                 | 4         |
| Fig S4. (a) C <sub>2</sub> H <sub>2</sub> , (b) C <sub>2</sub> H <sub>6</sub> , and (c) C <sub>2</sub> H <sub>4</sub> adsorption and desorption isotherms of ZJNU-400..                                                 | 5         |
| Fig S5. The fitting results of $Q_{st}$ for (a) C <sub>2</sub> H <sub>2</sub> , (b) C <sub>2</sub> H <sub>4</sub> , (c) C <sub>2</sub> H <sub>6</sub> on ZJNU-400 by using adsorption isotherms at 273 K and 298 K..... | 6         |
| Fig S6. The desorption curves were recorded on the column at 50 °C under He flow of 10 mL min <sup>-1</sup> . .....                                                                                                     | 7         |
| <b>S2. Supporting Tables</b> .....                                                                                                                                                                                      | <b>8</b>  |
| Table S1. Crystal data and structure refinement for ZJNU-400. ....                                                                                                                                                      | 8         |
| Table S2. The refined parameters for the Dual-site Langmuir-Freundlich equations fit for the pure isotherms of small gas molecule for ZJNU-400 at 298 K.....                                                            | 9         |
| Table S3. C <sub>2</sub> H <sub>6</sub> /C <sub>2</sub> H <sub>4</sub> (298K, 50:50) selectivity performance comparison of some previous reported MOFs. ....                                                            | 10        |
| <b>References</b> .....                                                                                                                                                                                                 | <b>11</b> |

## Calculation procedures of selectivity from IAST

The measured experimental data is excess loadings ( $q^{ex}$ ) of the pure components  $C_2H_2$ ,  $C_2H_6$  and  $C_2H_4$  for ZJNU-400, which should be converted to absolute loadings ( $q$ ) firstly.

$$q = q^{ex} + \frac{pV_{pore}}{ZRT} \quad (S1)$$

Here  $Z$  is the compressibility factor. The Peng-Robinson equation was used to estimate the value of compressibility factor to obtain the absolute loading, while the measure pore volume is also necessary.

In order to perform the IAST calculations, the single-component isotherm was fitted by the dual-site Langmuir-Freundlich (DSLFF) adsorption model to correlate the pure-component equilibrium data and further predict the adsorption of mixtures. The DSLFF model is described as:

$$q = q_{m_1} \times \frac{b_1 \times p^{1/n_1}}{1 + b_1 \times p^{1/n_1}} + q_{m_2} \times \frac{b_2 \times p^{1/n_2}}{1 + b_2 \times p^{1/n_2}} \quad (S2)$$

Here  $p$  is the pressure of the bulk gas at equilibrium with the adsorbed phase (kPa),  $q$  is the adsorbed amount per mass of adsorbent ( $\text{mol kg}^{-1}$ ),  $q_{m_1}$  and  $q_{m_2}$  are the saturation capacities of sites 1 and 2 ( $\text{mol kg}^{-1}$ ),  $b_1$  and  $b_2$  are the affinity coefficients of sites 1 and 2 ( $1/\text{kPa}$ ),  $n_1$  and  $n_2$  are the deviations from an ideal homogeneous surface. To investigate the separation of binary mixtures, the adsorption selectivity is defined by

$$S_{ij} = \frac{x_1/x_2}{y_1/y_2} \quad (S3)$$

$x_1$  and  $x_2$  are the absolute component loadings of the adsorbed phase in the mixture. These component loadings are also termed the uptake capacities. We calculate the values of  $x_1$  and  $x_2$  using the Ideal Adsorbed Solution Theory (IAST) of Myers and Prausnitz.

## S1. Supporting Figures

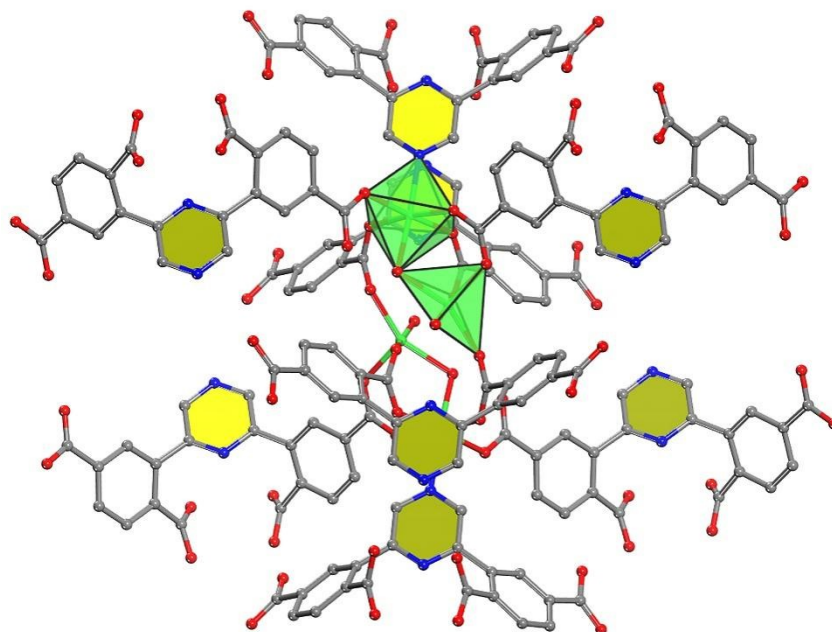

**Fig S1.** Coordinated environment of tetranuclear manganese cluster.

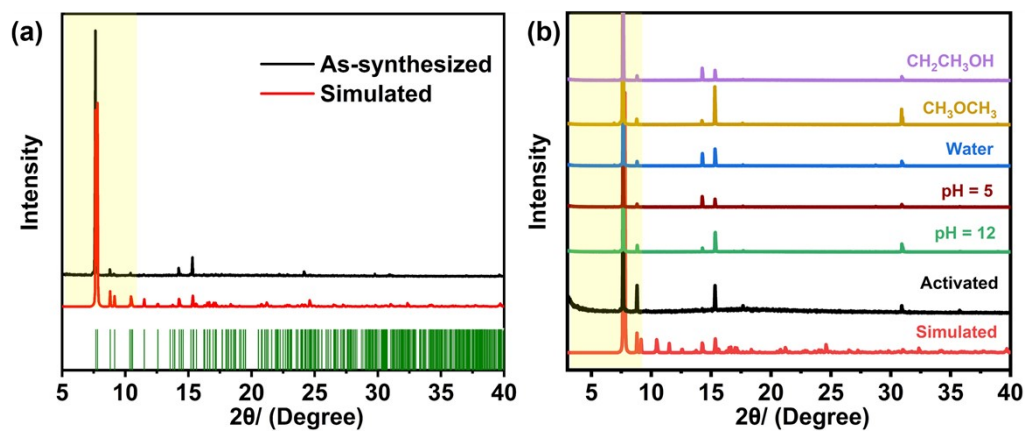

**Fig S2.** PXRD patterns of ZJNU-400 for simulated, as-synthesized and PXRD of in water and some organic solvent for three days.

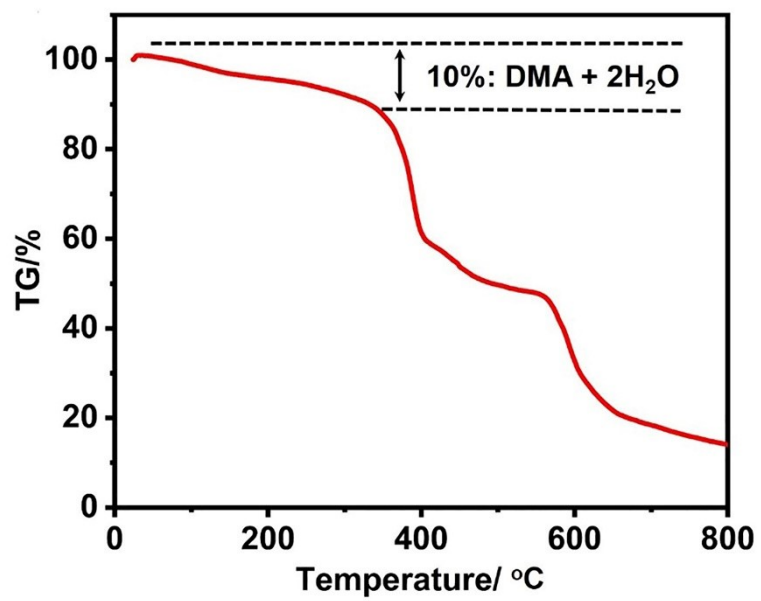

**Fig S3.** Thermogravimetric analysis curve of ZJNU-400 for the as-synthesized sample.

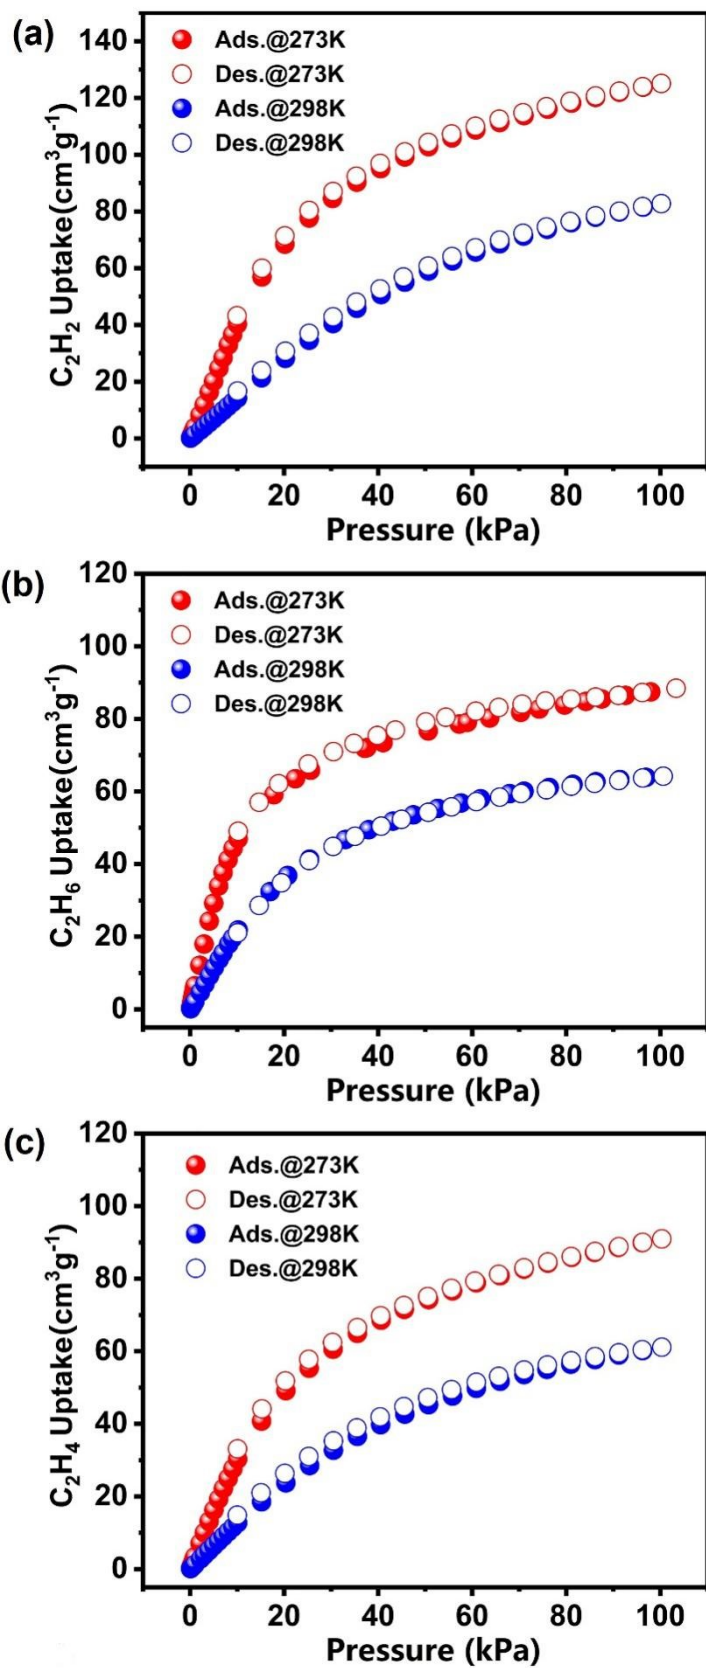

**Fig S4.** (a)  $C_2H_2$ , (b)  $C_2H_6$ , and (c)  $C_2H_4$  adsorption and desorption isotherms of ZJNU-400.

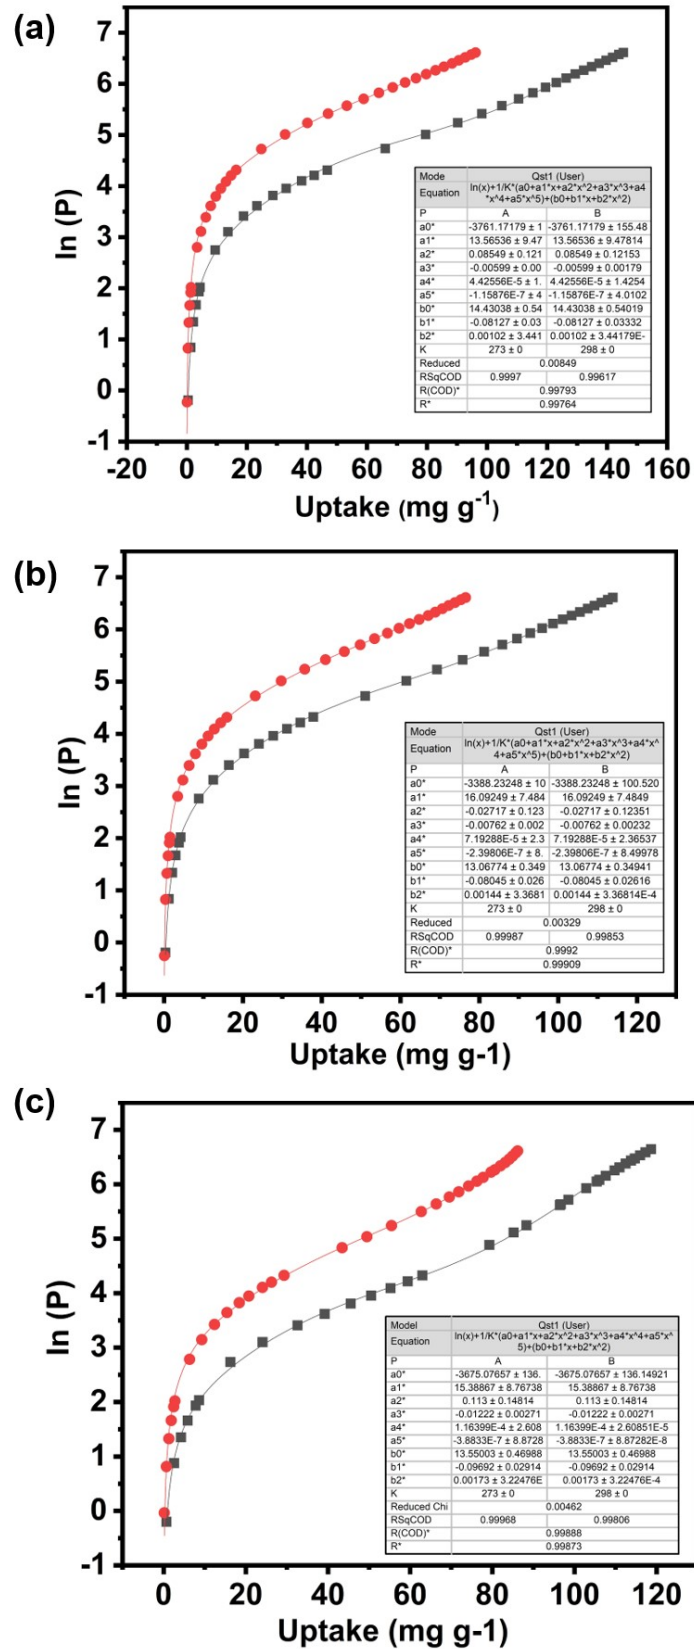

**Fig S5.** The fitting results of  $Q_{st}$  for (a)  $\text{C}_2\text{H}_2$ , (b)  $\text{C}_2\text{H}_4$ , (c)  $\text{C}_2\text{H}_6$  on ZJNU-400 by using adsorption isotherms at 273 K and 298 K.

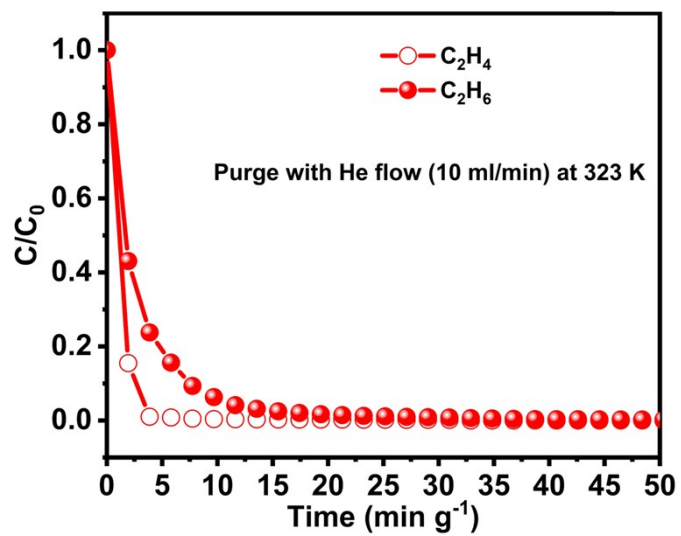

**Fig S6.** The desorption curves were recorded on the column at 50 °C under He flow of 10 mL  $\text{min}^{-1}$ .

## S2. Supporting Tables

**Table S1.** Crystal data and structure refinement for ZJNU-400.

| MOF                                                                         | ZJNU-400                                                                       |
|-----------------------------------------------------------------------------|--------------------------------------------------------------------------------|
| Empirical formula                                                           | C <sub>20</sub> H <sub>12</sub> Mn <sub>2</sub> N <sub>2</sub> O <sub>10</sub> |
| Formula weight                                                              | 550.20                                                                         |
| Wavelength (Å)                                                              | 0.71073                                                                        |
| Crystal system                                                              | Monoclinic                                                                     |
| Space group                                                                 | <i>P2<sub>1</sub>/n</i>                                                        |
| <i>a</i> (Å)                                                                | 15.3929(5)                                                                     |
| <i>b</i> (Å)                                                                | 12.4098(5)                                                                     |
| <i>c</i> (Å)                                                                | 17.0932(7)                                                                     |
| $\alpha$ (°)                                                                | 90                                                                             |
| $\beta$ (°)                                                                 | 90.9600(10)                                                                    |
| $\gamma$ (°)                                                                | 90                                                                             |
| Volume (Å <sup>3</sup> )                                                    | 3264.7(2)                                                                      |
| <i>Z</i>                                                                    | 4                                                                              |
| <i>D<sub>c</sub></i> (g/cm <sup>3</sup> )                                   | 1.119                                                                          |
| $\mu$ (mm <sup>-1</sup> )                                                   | 0.814                                                                          |
| <i>F</i> (000)                                                              | 1104.0                                                                         |
| Reflections collected                                                       | 32743                                                                          |
| Unique ( <i>R<sub>int</sub></i> )                                           | 7465(0.0289)                                                                   |
| Goodness-of-fit on <i>F</i> <sup>2</sup>                                    | 1.045                                                                          |
| <i>R</i> <sub>1</sub> , <i>wR</i> <sub>2</sub> [ <i>I</i> > 2σ( <i>I</i> )] | 0.0238, 0.0650                                                                 |
| <i>R</i> <sub>1</sub> , <i>wR</i> <sub>2</sub> (all data)                   | 0.0284, 0.0672                                                                 |
| Largest diff. peak and hole (e/Å <sup>3</sup> )                             | 0.34/-0.22                                                                     |

The guest molecules were highly disordered and could not be modeled properly, thus the SQUEEZE routine of PLATON was applied to remove the contributions to the scattering from the solvent molecules. The reported refinements are of the guest-free structures using the \*.hkp files produced using the SQUEEZE routine.



**Table S2.** The refined parameters for the Dual-site Langmuir-Freundlich equations fit for the pure isotherms of small gas molecule for ZJNU-400 at 298 K.

| <b>Adso</b>                   | <b>q<sub>m1</sub></b>        | <b>b<sub>1</sub></b>      | <b>n<sub>1</sub></b> | <b>q<sub>m2</sub></b>        | <b>b<sub>2</sub></b>      | <b>n<sub>2</sub></b> | <b>R<sup>2</sup></b> |
|-------------------------------|------------------------------|---------------------------|----------------------|------------------------------|---------------------------|----------------------|----------------------|
| <b>rbate</b>                  | <b>[mmol g<sup>-1</sup>]</b> | <b>[kPa<sup>-1</sup>]</b> |                      | <b>[mmol g<sup>-1</sup>]</b> | <b>[kPa<sup>-1</sup>]</b> |                      |                      |
| C <sub>2</sub> H <sub>2</sub> | 4.50407                      | 0.0037                    | 1.4211               | 0.50000                      | 0.0834                    | 1.0000               | 1.0000               |
| C <sub>2</sub> H <sub>4</sub> | 0.08199                      | 0.3274                    | 1.0986               | 3.65780                      | 0.0094                    | 1.2203               | 1.0000               |
| C <sub>2</sub> H <sub>6</sub> | 1.14899                      | 0.0137                    | 1.5495               | 2.31735                      | 0.0336                    | 1.0000               | 1.0000               |

**Table S3.** C<sub>2</sub>H<sub>6</sub>/C<sub>2</sub>H<sub>4</sub> (298K, 50:50) selectivity performance comparison of some previous reported MOFs.

| <b>Compound</b>                                     | <b>C<sub>2</sub>H<sub>6</sub> uptake<br/>(cm<sup>3</sup> g<sup>-1</sup>)</b> | <b>Sel. C<sub>2</sub>H<sub>6</sub>/C<sub>2</sub>H<sub>4</sub><br/>(v:v 50:50)</b> | <b>Reference</b> |
|-----------------------------------------------------|------------------------------------------------------------------------------|-----------------------------------------------------------------------------------|------------------|
| <b>ZJNU-400</b>                                     | <b>64</b>                                                                    | <b>2.8</b>                                                                        | <b>This work</b> |
| STU-1                                               | 74.1                                                                         | 1.5                                                                               | 1                |
| ZUL-C4                                              | 65.6                                                                         | 2.2                                                                               | 2                |
| UiO-66-2Me                                          | 48.16                                                                        | 2.9                                                                               | 3                |
| MOF-808-Bzz                                         | 49.28                                                                        | 1.9                                                                               | 4                |
| NKU-200-Tb                                          | 60.25                                                                        | 2.1                                                                               | 5                |
| Co-9-ina                                            | 84                                                                           | 2.7                                                                               | 6                |
| BUT-150                                             | 96.3                                                                         | 1.15                                                                              | 7                |
| Y-TATB                                              | 97.0                                                                         | 1.8                                                                               | 8                |
| JNU-6-CH3                                           | 103.7                                                                        | 2.2                                                                               | 9                |
| JNU-6                                               | 113.6                                                                        | 1.9                                                                               | 9                |
| UIO-67-(NH <sub>2</sub> ) <sub>2</sub> <sup>a</sup> | 119.2                                                                        | 1.7                                                                               | 10               |
| MAF-49                                              | 38.5                                                                         | 2.7                                                                               | 11               |
| Ni-MOF 2                                            | 133                                                                          | 1.9                                                                               | 12               |
| Co-TATB <sup>a</sup>                                | 72.35                                                                        | 1.4                                                                               | 13               |
| Ni(bdc)(ted)0.5                                     | 112                                                                          | 2.0                                                                               | 14               |
| UTSA-30                                             | 47                                                                           | 3.8                                                                               | 15               |
| Fe <sub>2</sub> (O <sub>2</sub> )(dobdc)            | 73.7                                                                         | 4.4                                                                               | 16               |
| Cu(Qc) <sub>2</sub>                                 | 41.4                                                                         | 3.4                                                                               | 17               |
| Co(AlN) <sub>2</sub>                                | 70.9                                                                         | 2.9                                                                               | 18               |
| UiO-66-2CF <sub>3</sub>                             | 19.2                                                                         | 2.5                                                                               | 19               |
| ZIF-4                                               | 51.5                                                                         | 2.1                                                                               | 20               |
| MUF-15                                              | 105.0                                                                        | 1.9                                                                               | 21               |
| IRMOF-8                                             | 112.4                                                                        | 1.8                                                                               | 22               |
| ZJU-121a                                            | 69.4                                                                         | 1.5                                                                               | 23               |
| Azole-Th-1                                          | 100.2                                                                        | 1.4                                                                               | 24               |
| UTSA-35                                             | 54.4                                                                         | 1.4                                                                               | 25               |
| MIL-53(Al)                                          | 45.9                                                                         | 1.3                                                                               | 26               |
| TJT-100                                             | 79                                                                           | 1.2                                                                               | 27               |
| LIFM-28                                             | 22.4                                                                         | 1.1                                                                               | 28               |

<sup>a</sup>C<sub>2</sub>H<sub>6</sub>, C<sub>2</sub>H<sub>4</sub> uptake, uptake ratio and IAST selectivity were all measured at 296 K.

## References

1. D. Luo, Y.-L. Peng, M. Xie, M. Li, A. A. Bezrukov, T. Zuo, X.-Z. Wang, Y. Wu, Y. Y. Li, A. R. Lowe, M. a. Chorążewski, Y. Grosu, Z. Zhang, M. J. Zaworotko, X.-P. Zhou and D. Li, Improving ethane/ethylene separation performance under humid conditions by spatially modified zeolitic imidazolate frameworks, *ACS Appl. Mater. Interfaces*, 2022, 14, 11547-11558.
2. J. Zhou, T. Ke, X. Zhu, B. Jin, Z. Bao, Z. Zhang, Y. Yang, Q. Ren and Q. Yang, Combination of low-polar and polar binding sites in aliphatic mofs for the efficient c2h6/c2h4 separation, *ACS Appl. Mater. Interfaces*, 2023, 15, 3387-3394.
3. W. Park, T.-H. Kim, K. Hyun Oh, H. Hee Han, Y. Choi, K. Kim and Y.-S. Bae, High C<sub>2</sub>H<sub>4</sub>/C<sub>2</sub>H<sub>6</sub> selectivity via incorporation of dense methyl groups into a stable zr-based mof with cavity-like pores, *Chem. Eng. J.*, 2024, 481, 148707.
4. C. Song, F. Zheng, Y. Liu, Q. Yang, Z. Zhang, Q. Ren and Z. Bao, Spatial distribution of nitrogen binding sites in metal-organic frameworks for selective ethane adsorption and one-step ethylene purification, *Angew. Chem. Int. Ed.*, 2023, 62, e202313855.
5. J.-J. Pang, Z.-H. Ma, Q.-Q. Yang, K. Zhang, X. Lian, H. Huang, Z.-Q. Yao, B. Li, J. Xu and X.-H. Bu, A highly connected metal-organic framework with a specific nonpolar nanotrap for inverse ethane/ethylene separation, *Inorg. Chem. Front.*, 2023, 10, 6407-6413.
6. S.-M. Wang, H.-R. Liu, S.-T. Zheng, H.-L. Lan, Q.-Y. Yang and Y.-Z. Zheng, Control of pore structure by the solvent effect for efficient ethane/ethylene separation, *Sep. Purif. Technol.*, 2023, 304, 122378.
7. H.-T. Wang, Q. Chen, X. Zhang, Y.-L. Zhao, M.-M. Xu, R.-B. Lin, H. Huang, L.-H. Xie and J.-R. Li, Two isostructural metal-organic frameworks with unique nickel clusters for c2h2/c2h6/c2h4 mixture separation, *J. Mater. Chem. A*, 2022, 10, 12497-12502.
8. S. Zhao, J. Yao, Q. Fan, Y. Yuan, S. Tu, Y. Wu and Q. Xia, A highly stable yttrium-based metal-organic framework with two-fold interpenetrated and cage-like pore structure for one-step purification of ethylene from ethylene/ethane mixture, *Sep. Purif. Technol.*, 2024, 330, 125256.
9. X.-J. Xie, Y. Wang, Q.-Y. Cao, R. Krishna, H. Zeng, W. Lu and D. Li, Surface engineering on a microporous metal-organic framework to boost ethane/ethylene separation under humid conditions, *Chem. Sci.*, 2023, 14, 11890-11895.
10. X.-W. Gu, J.-X. Wang, E. Wu, H. Wu, W. Zhou, G. Qian, B. Chen and B. Li, Immobilization of lewis basic sites into a stable ethane-selective mof enabling one-step separation of ethylene from a ternary mixture, *J. Am. Chem. Soc.*, 2022, 144, 2614-2623.
11. P.-Q. Liao, W.-X. Zhang, J.-P. Zhang and X.-M. Chen, Efficient purification of ethene by an ethane-trapping metal-organic framework, *Nat. Commun.*, 2015, 6, 8697.
12. Y. Ye, Y. Xie, Y. Shi, L. Gong, J. Phipps, A. M. Al-Enizi, A. Nafady, B. Chen and S. Ma, A microporous metal-organic framework with unique aromatic pore surfaces for high performance c2h6/c2h4 separation, *Angew. Chem. Int. Ed.*, 2023, 62, e202302564.
13. L. Liu, Y. Bo, W. Zhuang, Z. Xie, Y. Yang, Q. Lin, D. Chen, Z. Yao and S. Xiang, A microporous metal-organic framework with channels constructed from nonpolar aromatic rings for the selective separation of ethane/ethylene mixtures, *ChemPlusChem*, 2022, 87, e202100482.
14. W. Liang, F. Xu, X. Zhou, J. Xiao, Q. Xia, Y. Li and Z. Li, Ethane selective adsorbent ni(bdc)(ted)0.5 with high uptake and its significance in adsorption separation of ethane and ethylene, *Chem. Eng. Sci.*, 2016, 148, 275-281.
15. Y. He, S. Xiang, Z. Zhang, S. Xiong, F. R. Fronczek, R. Krishna, M. O'Keeffe and B. Chen,

A microporous lanthanide-tricarboxylate framework with the potential for purification of natural gas, *Chem. Commun.*, 2012, 48, 10856-10858.

16. L. Li, R.-B. Lin, R. Krishna, H. Li, S. Xiang, H. Wu, J. Li, W. Zhou and B. Chen, Ethane/ethylene separation in a metal-organic framework with iron-peroxo sites, *Science*, 2018, 362, 443-446.

17. R.-B. Lin, H. Wu, L. Li, X.-L. Tang, Z. Li, J. Gao, H. Cui, W. Zhou and B. Chen, Boosting Ethane/Ethylene Separation within Isoreticular Ultramicroporous Metal–Organic Frameworks, *J. Am. Chem. Soc.*, 2018, 140, 12940-12946.

18. M. Kang, D. W. Kang, J. H. Choe, H. Kim, D. W. Kim, H. Park and C. S. Hong, A Robust Hydrogen-Bonded Metal–Organic Framework with Enhanced Ethane Uptake and Selectivity, *Chem. Mater.*, 2021, 33, 6193-6199.

19. J. Pires, J. Fernandes, K. Dedecker, J. R. B. Gomes, G. Pérez-Sánchez, F. Nouar, C. Serre and M. L. Pinto, Enhancement of Ethane Selectivity in Ethane–Ethylene Mixtures by Perfluoro Groups in Zr-Based Metal-Organic Frameworks, *ACS Appl. Mater. Interfaces*, 2019, 11, 27410-27421.

20. M. Hartmann, U. Böhme, M. Hovestadt and C. Paula, Adsorptive Separation of Olefin/Paraffin Mixtures with ZIF-4, *Langmuir*, 2015, 31, 12382-12389.

21. O. T. Qazvini, R. Babarao, Z.-L. Shi, Y.-B. Zhang and S. G. Telfer, A Robust Ethane-Trapping Metal–Organic Framework with a High Capacity for Ethylene Purification, *J. Am. Chem. Soc.*, 2019, 141, 5014-5020.

22. J. Pires, M. L. Pinto and V. K. Saini, Ethane Selective IRMOF-8 and Its Significance in Ethane–Ethylene Separation by Adsorption, *ACS Appl. Mater. Interfaces*, 2014, 6, 12093-12099.

23. J. Pei, J.-X. Wang, K. Shao, Y. Yang, Y. Cui, H. Wu, W. Zhou, B. Li and G. Qian, Engineering microporous ethane-trapping metal–organic frameworks for boosting ethane/ethylene separation, *J. Mater. Chem.*, 2020, 8, 3613-3620.

24. Z. Xu, X. Xiong, J. Xiong, R. Krishna, L. Li, Y. Fan, F. Luo and B. Chen, A robust Th-azole framework for highly efficient purification of C<sub>2</sub>H<sub>4</sub> from a C<sub>2</sub>H<sub>4</sub>/C<sub>2</sub>H<sub>2</sub>/C<sub>2</sub>H<sub>6</sub> mixture, *Nat. Commun.*, 2020, 11, 3163.

25. Y. He, Z. Zhang, S. Xiang, F. R. Fronczek, R. Krishna and B. Chen, A robust doubly interpenetrated metal–organic framework constructed from a novel aromatic tricarboxylate for highly selective separation of small hydrocarbons, *Chem. Commun.*, 2012, 48, 6493-6495.

26. R. P. P. L. Ribeiro, B. C. R. Camacho, A. Lyubchik, I. A. A. C. Esteves, F. J. A. L. Cruz and J. P. B. Mota, Experimental and computational study of ethane and ethylene adsorption in the MIL-53(Al) metal organic framework, *Microporous Mesoporous Mater.*, 2016, 230, 154-165.

27. H.-G. Hao, Y.-F. Zhao, D.-M. Chen, J.-M. Yu, K. Tan, S. Ma, Y. Chabal, Z.-M. Zhang, J.-M. Dou, Z.-H. Xiao, G. Day, H.-C. Zhou and T.-B. Lu, Simultaneous Trapping of C<sub>2</sub>H<sub>2</sub> and C<sub>2</sub>H<sub>6</sub> from a Ternary Mixture of C<sub>2</sub>H<sub>4</sub>/C<sub>2</sub>H<sub>2</sub>/C<sub>2</sub>H<sub>6</sub> in a Robust Metal–Organic Framework for the Purification of C<sub>2</sub>H<sub>4</sub>, *Angew. Chem. Int. Ed.*, 2018, 57, 16067-16071.

28. C.-X. Chen, Z.-W. Wei, T. Pham, P. C. Lan, L. Zhang, K. A. Forrest, S. Chen, A. M. Al-Enizi, A. Nafady, C.-Y. Su and S. Ma, Nanospace Engineering of Metal–Organic Frameworks through Dynamic Spacer Installation of Multifunctionalities for Efficient Separation of Ethane from Ethane/Ethylene Mixtures, *Angew. Chem. Int. Ed.*, 2021, 60, 9680-9685.
